# Supplementary material for: Radiomics-Informed Modeling for Transcranial Ultrasound Stimulation: Age Matters
Source: Front Neurosci. 2022 Jun 15;16:935283. doi: 10.3389/fnins.2022.935283 (PMC9240751; doi:10.3389/fnins.2022.935283)
Supplement: Supplementary file 1 [file Table_1.XLSX]

## Sheet: Sheet1
Authors	Age range	Avergare age	Publication year	Title of paper	Link
Yi Zhang et al	22-53	31.8	2021	Transcranial ultrasound stimulation of the human motor cortex	https://pubmed.ncbi.nlm.nih.gov/34901788/
Xue Xia et al	21-44	33.5	2021	Time course of the effects of low-intensity transcranial ultrasound on the excitability of ipsilateral and contralateral human primary motor cortex	https://pubmed.ncbi.nlm.nih.gov/34487826/
Verena Braun et al	19-34	26.22	2020	Transcranial ultrasound stimulation in humans is associated with an auditory confound that can be effectively masked	https://pubmed.ncbi.nlm.nih.gov/32891872/
Ke Zeng et al	23-49	30.8	2022	Induction of Human Motor CortexPlasticity by Theta Burst TranscranialUltrasound Stimulation	https://onlinelibrary.wiley.com/doi/epdf/10.1002/ana.26294
